# Supplementary material for: The Efficacy of Prophylactic Antibiotics on Post-Stroke Infections: An Updated Systematic Review and Meta-Analysis
Source: PubMed Central journal article supplement (PMC5107889; doi:10.1038/srep36656), 2016-11-14
Supplement: srep36656-s1.pdf [file srep36656-s1.pdf]

## **Supplementary information**

### **The Efficacy of Prophylactic Antibiotics on Post-Stroke Infections: An Updated Systematic Review and Meta-Analysis**

Liang Liu, MD<sup>1\*</sup>; Xiao-Yi Xiong, PhD<sup>1\*</sup>; Qin Zhang, MD<sup>1</sup>; Xiao-Tang Fan, PhD<sup>2</sup>;

Qing-Wu Yang, MD<sup>1</sup>

<sup>1</sup>Department of Neurology, Xinqiao Hospital, The Third Military Medical University,  
No. 183, Xinqiao Main street, Shapingba District, Chongqing 400037, China

<sup>2</sup>Department of Developmental Neuropsychology, School of Psychology, Third  
Military Medical University, Chongqing 400037, China

\* This authors contributed equally to this work.

#### **Correspondence to:**

Qing-Wu Yang, email: yangqwmls@hotmail.com

Xiao-Tang Fan, email: fanxiaotang2005@163.com

**Supplemental Figures and Figure Legends:**

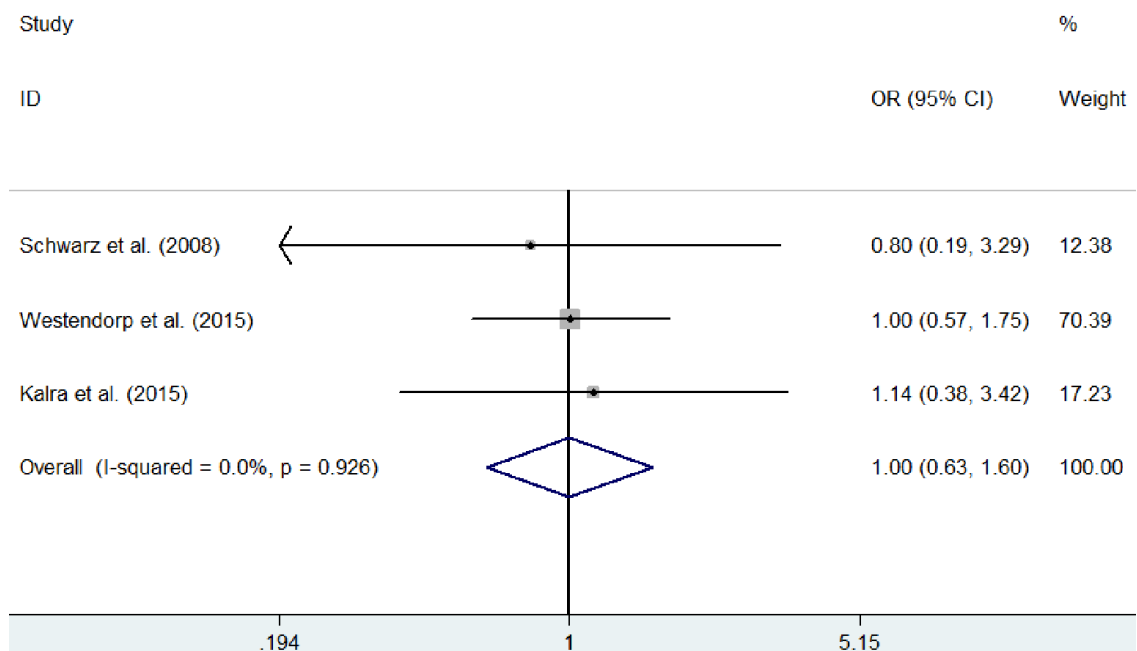

**Supplementary Figure S1.** Forest plots of other infections with prophylactic antibiotics treatment at stroke onset in observational studies. OR, odds ratio; CI, confidence interval.

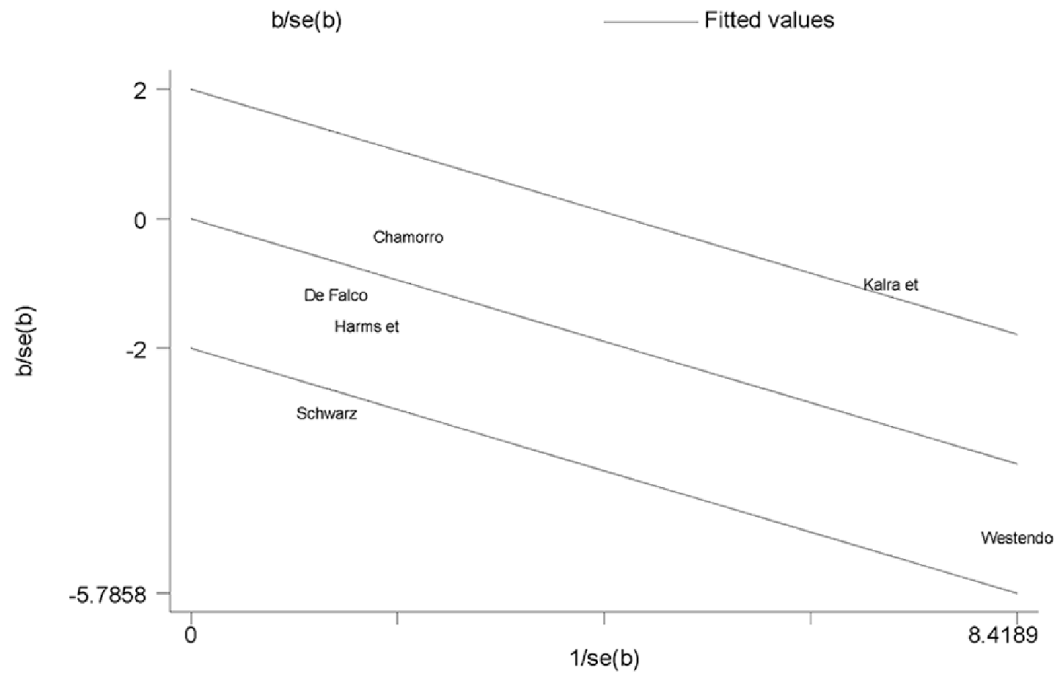

**Supplementary Figure S2.** Galbraith plot of prophylactic antibiotics treatment at stroke onset and the occurrence rate of infections.

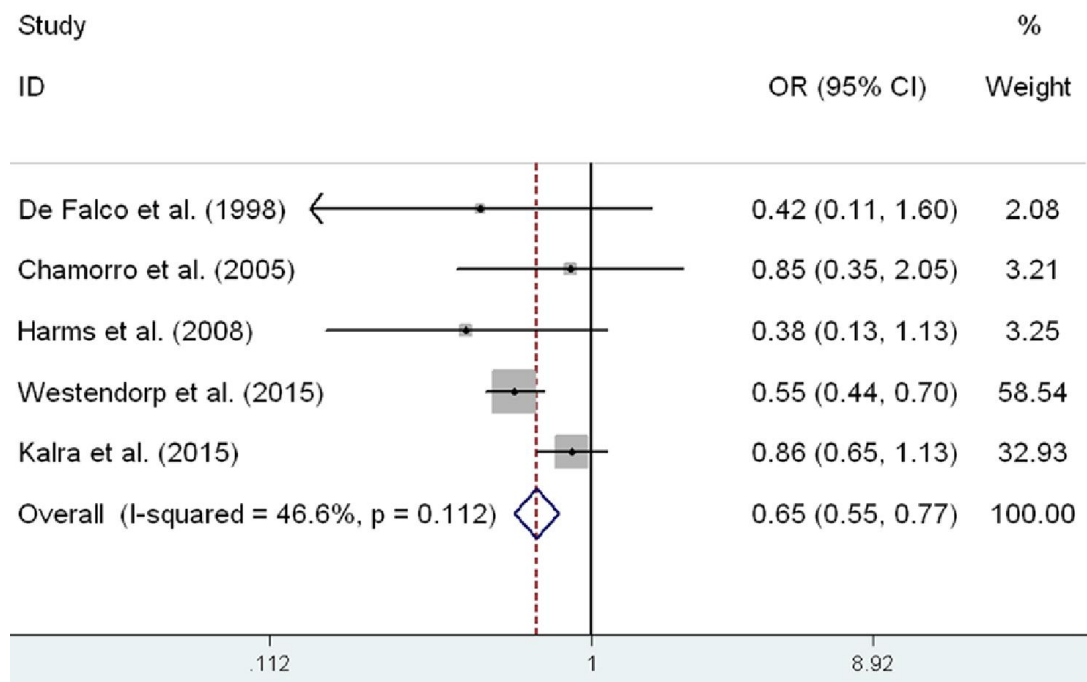

**Supplementary Figure S3.** Forest plot of prophylactic antibiotics treatment at stroke onset and the occurrence rate of infections after removing one study. OR, odds ratio; CI, confidence interval.

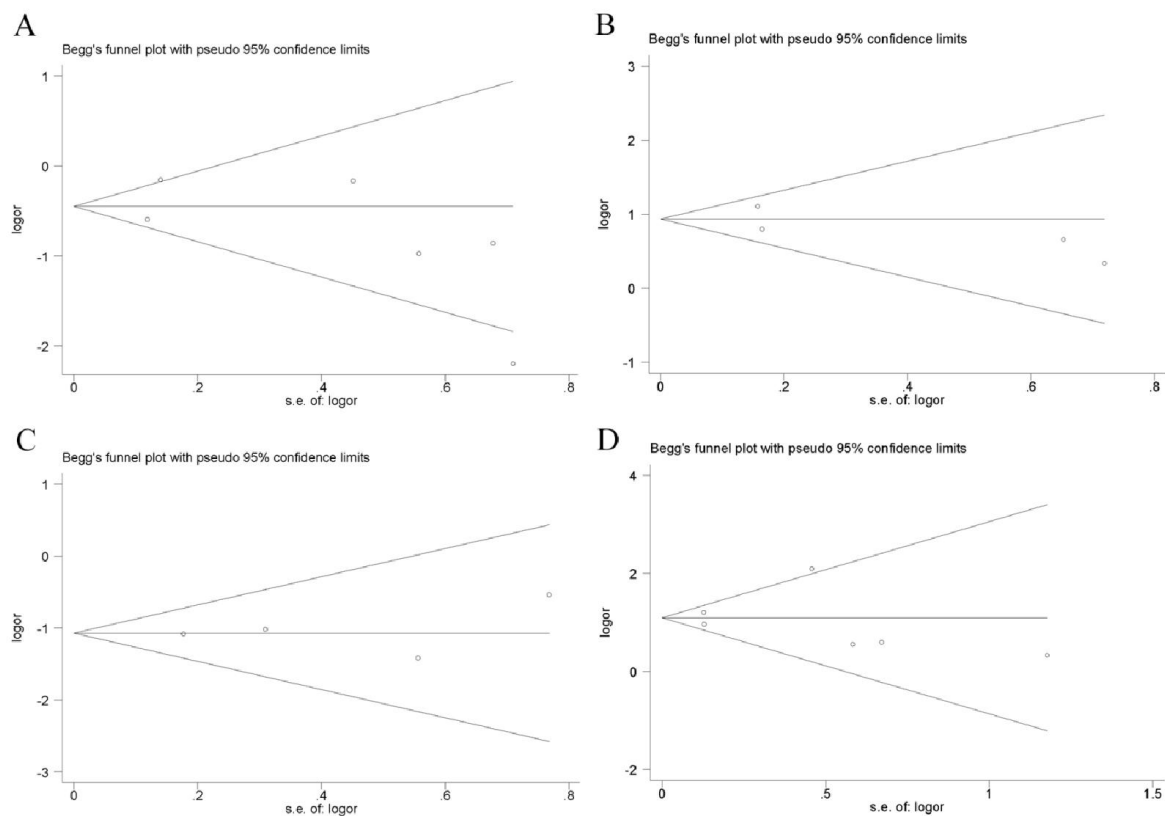

**Supplementary Figure S4.** Funnel plots of studies examining the association between prophylactic antibiotics treatment at stroke onset and the occurrence rate of infections (**A**), pneumonia (**B**), urinary tract infections (**C**) and mortality (**D**).

**Supplementary Table S1.** The risk of bias assessment of included studies

| <b>Author (publication year)</b> | <b>Bias</b>                                                 | <b>Authors' judgement</b> | <b>Support for judgement</b>                                      |
|----------------------------------|-------------------------------------------------------------|---------------------------|-------------------------------------------------------------------|
| De Falco et al. (1998)           | Random sequence generation (selection bias)                 | Low risk                  | This study is conducted randomly                                  |
|                                  | Allocation concealment (selection bias)                     | Unclear risk              | This study not mention allocation concealment                     |
|                                  | Blinding (performance bias and detection bias) All outcomes | High risk                 | Blinding of outcome assessment is not described                   |
|                                  | Incomplete outcome data (attrition bias) All outcomes       | High risk                 | No reports about completeness of follow-up and outcome assessment |
|                                  | Selective reporting (reporting bias)                        | High risk                 | Outcome assessment did not perform at a fixed time point          |
|                                  | Other bias                                                  | Low risk                  | No found                                                          |

|                           |                                                             |          |                                                                                                                       |
|---------------------------|-------------------------------------------------------------|----------|-----------------------------------------------------------------------------------------------------------------------|
| Chamorro et al.<br>(2005) | Random sequence generation (selection bias)                 | Low risk | This study is conducted randomly                                                                                      |
|                           | Allocation concealment (selection bias)                     | Low risk | Study treatment was prepared at the central pharmacy of the institution and kept within its premises until allocation |
|                           | Blinding (performance bias and detection bias) All outcomes | Low risk | This is a double-blind and placebo controlled study. All outcomes were evaluated blindly                              |
|                           | Incomplete outcome data (attrition bias) All outcomes       | Low risk | There were no losses to follow-up                                                                                     |
|                           | Selective reporting (reporting bias)                        | Low risk | All outcomes are reported                                                                                             |
|                           | Other bias                                                  | Low risk | No found                                                                                                              |

|                     |                                                             |           |                                                                                                                                |
|---------------------|-------------------------------------------------------------|-----------|--------------------------------------------------------------------------------------------------------------------------------|
| Lampl et al. (2007) | Random sequence generation (selection bias)                 | Low risk  | This study is conducted randomly by using the 8th number of the subject's identity card                                        |
|                     | Allocation concealment (selection bias)                     | High risk | Physicians were aware of the treatment because they knew that patients with even/odd NID numbers would get a certain treatment |
|                     | Blinding (performance bias and detection bias) All outcomes | Low risk  | Outcomes were assessed blindly                                                                                                 |
|                     | Incomplete outcome data (attrition bias) All outcomes       | High risk | Some outcomes (Scores on NIHSS, BI and mRS) are presented as means. The number of patients lost to follow-up is not mentioned. |
|                     | Selective reporting (reporting bias)                        | Low risk  | All outcomes are reported                                                                                                      |
|                     | Other bias                                                  | Low risk  | No found                                                                                                                       |



|                     |                                                             |           |                                                                                                                                                  |
|---------------------|-------------------------------------------------------------|-----------|--------------------------------------------------------------------------------------------------------------------------------------------------|
| Harms et al. (2008) | Random sequence generation (selection bias)                 | Low risk  | A computer generated allocation schedule was used                                                                                                |
|                     | Allocation concealment (selection bias)                     | Low risk  | The necessary labelling, ensuring the blinding for patients, nursing personnel and investigating physicians shall be undertaken by the institute |
|                     | Blinding (performance bias and detection bias) All outcomes | Low risk  | This is a double-blind and placebo controlled study. All outcomes were evaluated blindly                                                         |
|                     | Incomplete outcome data (attrition bias) All outcomes       | High risk | There were 7 patients lost to follow-up                                                                                                          |
|                     | Selective reporting (reporting bias)                        | Low risk  | All outcomes are reported                                                                                                                        |
|                     | Other bias                                                  | Low risk  | No found                                                                                                                                         |

|                       |                                                             |           |                                                                      |
|-----------------------|-------------------------------------------------------------|-----------|----------------------------------------------------------------------|
| Schwarz et al. (2008) | Random sequence generation (selection bias)                 | Low risk  | A computer generated allocation schedule was used                    |
|                       | Allocation concealment (selection bias)                     | Low risk  | Each number was hidden in a sealed envelope                          |
|                       | Blinding (performance bias and detection bias) All outcomes | High risk | The assessment of the score of NIHSS and mRS did not conduct blindly |
|                       | Incomplete outcome data (attrition bias) All outcomes       | Low risk  | There were no losses to follow-up                                    |
|                       | Selective reporting (reporting bias)                        | Low risk  | All outcomes are reported                                            |
|                       | Other bias                                                  | Low risk  | No found                                                             |

|                             |                                                             |           |                                                                                          |
|-----------------------------|-------------------------------------------------------------|-----------|------------------------------------------------------------------------------------------|
| Westendorp et al.<br>(2015) | Random sequence generation (selection bias)                 | Low risk  | Randomisation was done with an online tool                                               |
|                             | Allocation concealment (selection bias)                     | High risk | The patient and the treating physician were aware of the treatment assignment            |
|                             | Blinding (performance bias and detection bias) All outcomes | Low risk  | The research nurses who did the follow-up interviews were masked to treatment allocation |
|                             | Incomplete outcome data (attrition bias) All outcomes       | High risk | There were 24 patients lost to follow-up                                                 |
|                             | Selective reporting (reporting bias)                        | Low risk  | All outcomes are reported                                                                |
|                             | Other bias                                                  | Low risk  | No found                                                                                 |

|                     |                                                             |           |                                                                                                                                             |
|---------------------|-------------------------------------------------------------|-----------|---------------------------------------------------------------------------------------------------------------------------------------------|
| Kalra et al. (2015) | Random sequence generation (selection bias)                 | Low risk  | Randomisation was computer generated and done away from the trial office                                                                    |
|                     | Allocation concealment (selection bias)                     | Low risk  | Randomisation was computer generated and admitted directly to specialist care                                                               |
|                     | Blinding (performance bias and detection bias) All outcomes | Low risk  | Patients, research staff obtaining data, and statisticians undertaking analyses of the outcome data were unaware of stroke unit allocation. |
|                     | Incomplete outcome data (attrition bias) All outcomes       | High risk | 34 patients lost to follow-up                                                                                                               |
|                     | Selective reporting (reporting bias)                        | Low risk  | All outcomes are reported                                                                                                                   |
|                     | Other bias                                                  | Low risk  | No found                                                                                                                                    |

**Supplementary Table S2.** The data about other infections of the included studies.

| <b>Author<br/>(publication year)</b> | <b>Other Infections<br/>Type</b> | <b>Other Infections<br/>Treatment vs Control</b> |
|--------------------------------------|----------------------------------|--------------------------------------------------|
| Schwarz et al.<br>(2008)             | Tracheobronchitis                | 2/30 vs 3/30                                     |
|                                      | Other/unclear origin             | 2/30 vs 2/30                                     |
| Westendorp et al.<br>(2015)          | Other infections<br>(unclear)    | 25/1268 vs 25/1270                               |
| Kalra et al. (2015)                  | Other infections<br>(unclear)    | 7/615 vs 6/602                                   |

**Supplementary Table S3.** Definitions Used for Infection

| <b>Author (publication year)</b> | <b>Source of infection definition</b>                                                                                                                                                                                                                                                                                                                                                                           |
|----------------------------------|-----------------------------------------------------------------------------------------------------------------------------------------------------------------------------------------------------------------------------------------------------------------------------------------------------------------------------------------------------------------------------------------------------------------|
| De Falco et al. (1998)           | NA                                                                                                                                                                                                                                                                                                                                                                                                              |
| Chamorro et al. (2005)           | Infection was defined if temperature >37.5°C in 2 determinations or >37.8°C in a single determination in patients with suggestive symptoms (ie, cough, dyspnea, pleuritic pain, urinary tract symptoms), white blood cell count >11 000/mL or >4000/mL, pulmonary infiltrate on chest x-rays, or cultures positive for a pathogen. Otherwise, temperature >37.8°C was classified as noninfectious hyperthermia. |
| Lampl et al. (2007)              | NA                                                                                                                                                                                                                                                                                                                                                                                                              |
| Harms et al. (2008)              | Criteria modified from US Centers for Disease Control and Prevention criteria                                                                                                                                                                                                                                                                                                                                   |
| Schwarz et al. (2008)            | Criteria from Paul Ehrlich Society for chemotherapy                                                                                                                                                                                                                                                                                                                                                             |
| Westendorp et al. (2015)         | First, clinical diagnosis according to the treating physician will be recorded. Second, diagnosis of infection the modified criteria of the United States Centres for Disease Control and Prevention                                                                                                                                                                                                            |
| Kalra et al. (2015)              | Criteria for pneumonia from the Centres for Disease Control and Prevention                                                                                                                                                                                                                                                                                                                                      |

NA, not available.
